# Supplementary material for: Burden of employment loss and absenteeism in adults and caregivers of children with sickle cell disease
Source: PubMed Central journal article supplement — Blood Adv. 2024 Jan 20;8(5):1143–50. doi: 10.1182/bloodadvances.2023012002 (PMC10909714; doi:10.1182/bloodadvances.2023012002), 2024-01-20
Supplement: BLOODA_ADV-2023-012002-mmc1.pdf [file BLOODA_ADV-2023-012002-mmc1.pdf]

**Supplementary Table 1.** Comparison of adult participants in two time points (OSU/Vanderbilt versus Chicago/UCSF/UTHSC).

| Combined               | Odds Ratio | 95% CI       | p value |
|------------------------|------------|--------------|---------|
| <i>Age Group</i>       | 1.00       | (0.98, 1.03) | 0.9012  |
| <i>Sex</i>             | 0.58       | (0.30, 1.12) | 0.1057  |
| <i>1 year job loss</i> | 0.68       | (0.17, 2.77) | 0.5851  |
| <i>5 year job loss</i> | 0.71       | (0.26, 1.95) | 0.5025  |
| <i>Missed days</i>     | 0.92       | (0.48, 1.74) | 0.7908  |

**Supplementary Table 2.** Employment status of adults with sickle cell disease

| <b>What is your current employment status? Please select 1 or more of these categories.</b> | <b>Total</b> | <b>Male (n= 24)</b> | <b>Female (n= 32)</b> | <b>Other</b> |
|---------------------------------------------------------------------------------------------|--------------|---------------------|-----------------------|--------------|
| <i>Employed for wages (part- time or full-time)</i>                                         | 23 (39.7%)   | 9 (37.5%)           | 13 (40.6%)            | 1 (100%)     |
| <i>Self-employed</i>                                                                        | 5 (8.6%)     | 3 (12.5%)           | 2 (6.2%)              | 0            |
| <i>Out of work for 1 year or more</i>                                                       | 7 (12.1%)    | 4 (16.7%)           | 3 (9.4%)              | 0            |
| <i>Out of work for less than 1 year</i>                                                     | 5 (8.6%)     | 2 (8.3%)            | 3 (9.4%)              | 0            |
| <i>A homemaker</i>                                                                          | 2 (3.5%)     | 0                   | 2 (6.2%)              | 0            |
| <i>Retired</i>                                                                              | 5 (8.6%)     | 1 (4.2%)            | 4 (12.5%)             | 0            |
| <i>Unable to work (disabled)</i>                                                            | 1 (1.7%)     | 0                   | 1 (3.1%)              | 0            |
| <i>Prefer not to answer</i>                                                                 | 14 (24.1%)   | 4 (16.7)            | 10 (31.2%)            | 0            |

**Supplementary Table 3.** Estimated wages by educational attainment utilizing U.S. Census Bureau data

| Educational attainment                | Average 2021 income (\$) | Estimated daily wage (\$) |
|---------------------------------------|--------------------------|---------------------------|
| <i>No high school diploma</i>         | 30,378                   | 126.58                    |
| <i>High school, no college</i>        | 50,401                   | 210.0                     |
| <i>Some college</i>                   | 64,378                   | 268.24                    |
| <i>Bachelor's degree or higher</i>    | 115,456                  | 481.07                    |
| <i>Not reported- national average</i> | 70,784                   | 294.93                    |
